# Supplementary material for: The association of maternal plant-based diets and the growth of breastfed infants
Source: PubMed Central journal article supplement (PMC7146038; doi:10.34172/hpp.2020.25), 2020-03-30
Supplement: hpp-10-152-s001.pdf [file hpp-10-152-s001.pdf]

## Supplementary file 1

**Table S1.** Eighteen food groups constituting the plant-based diet score

| <b>Healthy Food Groups</b>      |                                                                                                                                                                                                                                                                       | <b>PDI</b>      | <b>hPDI</b>     | <b>uPDI</b>     |
|---------------------------------|-----------------------------------------------------------------------------------------------------------------------------------------------------------------------------------------------------------------------------------------------------------------------|-----------------|-----------------|-----------------|
| Whole grains                    | Whole grain breakfast cereal and other cooked breakfast cereal, oatmeal, dark bread and Persian bread such as Sangak, brown rice, other grains, bran, wheat and popcorn                                                                                               | Positive scores | Positive scores | Reverse scores  |
| Fruits                          | Raisins or grapes, prunes, bananas, cantaloupe, watermelon, fresh apples or pears, oranges, grapefruit, strawberries, blueberries, peaches, apricots and plums                                                                                                        | Positive scores | Positive scores | Reverse scores  |
| Vegetables                      | Tomatoes, tomato juice, tomato sauce, broccoli, cabbage, cauliflower, brussel sprouts, carrots, mixed vegetables, yellow or winter squash, eggplant or zucchini, yams or sweet potatoes, spinach, lettuce, celery, mushrooms, beets, alfalfa sprouts, garlic and corn | Positive scores | Positive scores | Reverse scores  |
| Nuts                            | Nuts, pistachios, peanuts and peanut butter                                                                                                                                                                                                                           | Positive scores | Positive scores | Reverse scores  |
| Legumes                         | String beans, soybeans, beans, lentils and peas                                                                                                                                                                                                                       | Positive scores | Positive scores | Reverse scores  |
| Vegetable oils                  | Oil-based salad dressing, vegetable oil used for cooking, olive oil, corn oil and sunflower oil                                                                                                                                                                       | Positive scores | Positive scores | Reverse scores  |
| Tea & Coffee                    | Tea and coffee                                                                                                                                                                                                                                                        | Positive scores | Positive scores | Reverse scores  |
| <b>Less healthy Food Groups</b> |                                                                                                                                                                                                                                                                       |                 |                 |                 |
| Fruit juices                    | Apple juice, orange juice, grapefruit juice and other fruit juice                                                                                                                                                                                                     | Positive scores | Reverse scores  | Positive scores |
| Refined grains                  | Refined grain breakfast cereal, white breads and Persian white breads such as Lavash, Barbari, Taftoon, Baget, , muffins or biscuits, white rice, crackers, pasta                                                                                                     | Positive scores | Reverse scores  | Positive scores |
| Potatoes                        | French fries, baked potatoes, potato chips                                                                                                                                                                                                                            | Positive scores | Reverse scores  | Positive scores |
| Sugar-sweetened beverages       | Colas with caffeine & sugar, colas without caffeine but with sugar, other carbonated beverages with sugar, non-carbonated fruit drinks with sugar                                                                                                                     | Positive scores | Reverse scores  | Positive scores |
| Sweets and Desserts             | Chocolates, candy bars, candy without chocolate, cookies (home-baked & ready-made), brownies, doughnuts, cake (home-baked & ready-made), sweet roll (home-baked & ready-made), pie (home-baked &                                                                      | Positive scores | Reverse scores  | Positive scores |

|                           |                                                                                                                                                 |                |                |                |
|---------------------------|-------------------------------------------------------------------------------------------------------------------------------------------------|----------------|----------------|----------------|
|                           | ready-made), jams, jellies, preserves, syrup and honey                                                                                          |                |                |                |
| <b>Animal Food Groups</b> |                                                                                                                                                 |                |                |                |
| Animal fat                | Butter added to food, butter and lard used for cooking                                                                                          | Reverse scores | Reverse scores | Reverse scores |
| Dairy                     | Skim low fat milk, whole milk, cream, sherbet, ice cream, yogurt, cottage cheese, cream cheese, other cheese and Persian dairy beverage (Doogh) | Reverse scores | Reverse scores | Reverse scores |
| Eggs                      | Eggs                                                                                                                                            | Reverse scores | Reverse scores | Reverse scores |
| Fish or Seafood           | Canned tuna and other canned, fresh or frozen fish                                                                                              | Reverse scores | Reverse scores | Reverse scores |
| Meat                      | Chicken or turkey, processed meats, liver, hamburger and beef or lamb                                                                           | Reverse scores | Reverse scores | Reverse scores |
| Misc. animal-based foods  | Pizza, mayonnaise and other creamy salad dressing                                                                                               | Reverse scores | Reverse scores | Reverse scores |

-Positive scores indicate that participants who are in the highest quintile of a food group received a score of 5.

-Reverse scores indicate that participants who are in the lowest quintile of a food group received a score of 5.

**Table S2.** Anthropometric characteristics of infants across tertiles of plant-based diet scores (N=290)

| Variables               |          | All            |                | PDI               |                | P*   | hPDI           |                   |                | P    | uPDI           |                   |                | P    |
|-------------------------|----------|----------------|----------------|-------------------|----------------|------|----------------|-------------------|----------------|------|----------------|-------------------|----------------|------|
|                         |          |                | T1<br>(≤52.99) | T2 (53-<br>57.99) | T3 (≥58)       |      | T1<br>(≤51.99) | T2 (52-<br>57.99) | T3 (≥58)       |      | T1<br>(≤50.99) | T2 (51-<br>58.99) | T3 (≥59)       |      |
|                         |          |                | N= 91          | N= 109            | N= 90          |      | N= 88          | N= 113            | N= 89          |      | N= 99          | N= 96             | N= 95          |      |
| Weight (kg)             |          |                |                |                   |                |      |                |                   |                |      |                |                   |                |      |
|                         | At birth | 3.14<br>(0.47) | 3.10<br>(0.50) | 3.16<br>(0.44)    | 3.14<br>(0.47) | 0.68 | 3.20<br>(0.50) | 3.14<br>(0.41)    | 3.08<br>(0.49) | 0.24 | 3.19<br>(0.40) | 3.06<br>(0.50)    | 3.16<br>(0.49) | 0.14 |
|                         | 2 months | 5.09<br>(0.69) | 5.13<br>(0.66) | 5.07<br>(0.72)    | 5.09<br>(0.69) | 0.81 | 5.07<br>(0.73) | 5.14<br>(0.67)    | 5.06<br>(0.68) | 0.68 | 5.16<br>(0.70) | 4.97<br>(0.73)    | 5.15<br>(0.63) | 0.09 |
|                         | 4 months | 6.47<br>(0.79) | 6.47<br>(0.79) | 6.47<br>(0.86)    | 6.47<br>(0.72) | 0.99 | 6.46<br>(0.85) | 6.53<br>(0.74)    | 6.39<br>(0.81) | 0.46 | 6.54<br>(0.87) | 6.37<br>(0.76)    | 6.49<br>(0.75) | 0.29 |
| Height (cm)             |          |                |                |                   |                |      |                |                   |                |      |                |                   |                |      |
|                         | At birth | 48.9<br>(3.4)  | 49.0<br>(3.7)  | 49.1<br>(3.1)     | 48.5<br>(3.5)  | 0.44 | 48.8<br>(3.4)  | 49.2<br>(3.1)     | 48.7<br>(3.8)  | 0.48 | 48.8<br>(3.78) | 48.9<br>(2.8)     | 49.1<br>(3.6)  | 0.79 |
|                         | 2 months | 54.7<br>(4.5)  | 55.0<br>(4.4)  | 55.0<br>(4.4)     | 54.0<br>(4.6)  | 0.20 | 54.7<br>(4.6)  | 55.1<br>(4.2)     | 54.3<br>(4.7)  | 0.45 | 54.7<br>(4.7)  | 54.7<br>(3.9)     | 54.7<br>(4.9)  | 0.99 |
|                         | 4 months | 59.9<br>(5.1)  | 60.1<br>(5.2)  | 60.3<br>(4.6)     | 59.0<br>(5.4)  | 0.16 | 60.1<br>(5.3)  | 60.3<br>(4.8)     | 59.1<br>(5.2)  | 0.24 | 60.0<br>(5.3)  | 59.8<br>(4.5)     | 59.7<br>(5.4)  | 0.92 |
| Head circumference (cm) |          |                |                |                   |                |      |                |                   |                |      |                |                   |                |      |
|                         | At birth | 35.3<br>(2.3)  | 35.2<br>(2.6)  | 35.4<br>(2.1)     | 35.2<br>(2.1)  | 0.74 | 35.2<br>(2.2)  | 35.3<br>(2.0)     | 35.3<br>(2.7)  | 0.89 | 35.5<br>(2.8)  | 35.0<br>(1.7)     | 35.3<br>(2.1)  | 0.38 |
|                         | 2 months | 38.7<br>(2.6)  | 38.7<br>(3.0)  | 38.8<br>(2.4)     | 38.5<br>(2.6)  | 0.67 | 38.6<br>(2.3)  | 38.7<br>(2.2)     | 38.9<br>(3.4)  | 0.75 | 38.9<br>(3.4)  | 38.3<br>(1.5)     | 38.8<br>(2.6)  | 0.19 |
|                         | 4 months | 41.7<br>(3.4)  | 41.7<br>(3.6)  | 42.0<br>(3.4)     | 41.2<br>(0.3)  | 0.31 | 41.5<br>(2.8)  | 41.6<br>(2.8)     | 41.8<br>(4.4)  | 0.82 | 41.9<br>(4.1)  | 41.3<br>(2.7)     | 41.8<br>(3.1)  | 0.39 |

Data are mean (SD)

\* P values calculated by one-way ANOVA.

PDI: whole plant-based diet index, hPDI: healthful plant-based diet index, uPDI: unhealthful plant-based diet index.

**Table S3.** Nutrient intake of mothers across tertiles of plant-based diet scores (N=290)

| Variables                | PDI                |                    |                    | P*               | hPDI               |                    |                    | P                | uPDI              |                    |                    | P                |
|--------------------------|--------------------|--------------------|--------------------|------------------|--------------------|--------------------|--------------------|------------------|-------------------|--------------------|--------------------|------------------|
|                          | T1<br>(≤52.99)     | T2 (53-<br>57.99)  | T3 (≥58)           |                  | T1<br>(≤51.99)     | T2 (52-<br>57.99)  | T3 (≥58)           |                  | T1<br>(≤50.99)    | T2 (51-<br>58.99)  | T3 (≥59)           |                  |
|                          | N= 91              | N= 109             | N= 90              |                  | N= 88              | N= 113             | N= 89              |                  | N= 99             | N= 96              | N= 95              |                  |
| Energy (kcal)            | 1888.7<br>(638.22) | 2258.9<br>(810.11) | 2589.9<br>(839.42) | <b>&lt;0.001</b> | 2592.7<br>(868.28) | 2147.4<br>(723.32) | 2026.6<br>(771.49) | <b>&lt;0.001</b> | 2808<br>(805.98)  | 2156.9<br>(609.32) | 1748.7<br>(636.33) | <b>&lt;0.001</b> |
| Carbohydrate (g)         | 294.40<br>(87.82)  | 313.80<br>(77.61)  | 333.70<br>(87.99)  | <b>&lt;0.001</b> | 303.4<br>(92.24)   | 316.3<br>(79.31)   | 321.3<br>(90.03)   | 0.051            | 312<br>(94.29)    | 318.9<br>(86.63)   | 310.8<br>(93.95)   | 0.471            |
| Protein (g)              | 90.88<br>(32.16)   | 84.94<br>(28.42)   | 76.50<br>(32.33)   | <b>&lt;0.001</b> | 87.90<br>(33.69)   | 84.39<br>(28.93)   | 80.24<br>(33.01)   | <b>0.020</b>     | 91.68<br>(33.01)  | 84.99<br>(30.29)   | 75.55<br>(32.84)   | <b>&lt;0.001</b> |
| Fat (g)                  | 89.11<br>(40.33)   | 83.08<br>(35.57)   | 78.43<br>(40.33)   | <b>0.009</b>     | 86.87<br>(41.35)   | 81.63<br>(35.40)   | 82.63<br>(40.33)   | 0.251            | 83.01<br>(41.86)  | 80.55<br>(38.46)   | 87.08<br>(41.69)   | 0.142            |
| Saturated fatty acid (g) | 28.82<br>(13.61)   | 25.72<br>(12.08)   | 21.17<br>(13.78)   | <b>&lt;0.001</b> | 28.03<br>(14.29)   | 25.27<br>(12.25)   | 22.58<br>(13.95)   | <b>&lt;0.001</b> | 26.48<br>(14.97)  | 24.18<br>(13.78)   | 25.15<br>(14.97)   | 0.175            |
| Cholesterol (mg)         | 332.80<br>(206.11) | 264.60<br>(182.11) | 210.00<br>(206.62) | <b>&lt;0.001</b> | 330.7<br>(208.49)  | 268.8<br>(179.22)  | 208.4<br>(203.89)  | <b>&lt;0.001</b> | 307.9<br>(223.47) | 266.7<br>(205.26)  | 230.9<br>(222.62)  | <b>0.001</b>     |
| Dietary fiber (g)        | 6.83<br>(4.59)     | 7.71<br>(4.08)     | 8.29<br>(4.59)     | <b>0.001</b>     | 6.59<br>(4.59)     | 7.58<br>(3.91)     | 8.66<br>(4.42)     | <b>&lt;0.001</b> | 8.63<br>(4.59)    | 7.69<br>(4.25)     | 6.48<br>(4.59)     | <b>&lt;0.001</b> |
| Sodium (mg)              | 8041<br>(7521.11)  | 8109<br>(6649.70)  | 7909<br>(7543.21)  | 0.941            | 8015<br>(7587.85)  | 8439<br>(6523.42)  | 7511<br>(7415.95)  | 0.271            | 7943<br>(7735.76) | 8099<br>(7106.36)  | 8038<br>(7709.71)  | 0.961            |
| Potassium (mg)           | 4397<br>(1771.70)  | 4438<br>(1566.61)  | 4523<br>(1776.81)  | 0.692            | 4216<br>(1773.48)  | 4504<br>(1524.65)  | 4618<br>(1733.31)  | <b>0.020</b>     | 4837<br>(1723.10) | 4541<br>(1583.03)  | 3958<br>(1717.31)  | <b>&lt;0.001</b> |
| Phosphorus (mg)          | 1922<br>(722.60)   | 1836<br>(638.90)   | 1687<br>(724.80)   | <b>0.001</b>     | 1836<br>(747.01)   | 1849<br>(642.33)   | 1756<br>(730.15)   | 0.222            | 1929<br>(744.62)  | 1831<br>(684.03)   | 1686<br>(742.24)   | <b>0.001</b>     |
| Zinc (mg)                | 10.1<br>(3.91)     | 9.7 (3.41)         | 8.6 (3.91)         | <b>&lt;0.001</b> | 9.47<br>(4.08)     | 9.66<br>(3.57)     | 9.35<br>(4.08)     | 0.603            | 10.54<br>(3.91)   | 9.60<br>(3.57)     | 8.34<br>(3.91)     | <b>&lt;0.001</b> |
| Magnesium (mg)           | 356.9<br>(134.20)  | 359.4<br>(118.70)  | 354<br>(134.70)    | 0.885            | 329.6<br>(131.56)  | 360.7<br>(113.01)  | 379.2<br>(128.50)  | <b>&lt;0.001</b> | 396.4<br>(126.79) | 359.2<br>(116.41)  | 313.5<br>(126.45)  | <b>&lt;0.001</b> |
| Calcium (mg)             | 1559<br>(858.80)   | 1469<br>(759.26)   | 1306<br>(861.21)   | <b>0.002</b>     | 1438<br>(883.84)   | 1501<br>(759.94)   | 1385<br>(863.76)   | 0.222            | 1593<br>(889.46)  | 1474<br>(817.13)   | 1323<br>(886.40)   | <b>0.010</b>     |
| Iron (mg)                | 11.70<br>(0.29)    | 12.34<br>(0.26)    | 12.59<br>(0.30)    | 0.106            | 12.02<br>(0.30)    | 12.01<br>(0.26)    | 12.68<br>(0.29)    | 0.178            | 12.99<br>(0.30)   | 12.17<br>(0.28)    | 11.45<br>(0.30)    | <b>0.005</b>     |
| Folate (mcg)             | 321<br>(153.08)    | 329.3<br>(133.94)  | 351.8<br>(151.98)  | <b>0.040</b>     | 314.8<br>(153.01)  | 335.2<br>(131.56)  | 350.5<br>(149.60)  | <b>0.02</b>      | 369.5<br>(148.9)  | 336.9<br>(136.84)  | 293.2<br>(148.41)  | <b>&lt;0.001</b> |
| Iodine (Ug)              | 0.17<br>(0.05)     | 0.31<br>(0.04)     | 0.37<br>(0.05)     | <b>0.030</b>     | 0.21<br>(0.05)     | 0.27<br>(0.04)     | 0.38<br>(0.05)     | 0.081            | 0.24<br>(0.05)    | 0.30<br>(0.05)     | 0.33<br>(0.05)     | 0.555            |
| Vitamin E (mg)           | 14.61<br>(18.04)   | 13.49<br>(15.99)   | 13.58<br>(18.04)   | 0.701            | 12.63<br>(18.21)   | 14.37<br>(15.65)   | 14.46<br>(17.87)   | 0.391            | 13.61<br>(18.67)  | 13.99<br>(17.15)   | 14.02<br>(18.60)   | 0.961            |
| Vitamin C (mg)           | 244.3<br>(273.51)  | 269.7<br>(241.85)  | 294.5<br>(274.36)  | 0.102            | 223.4<br>(272.49)  | 273<br>(234.36)    | 310.4<br>(266.36)  | <b>0.001</b>     | 316.5<br>(276.57) | 267.9<br>(254.10)  | 221.9<br>(275.72)  | <b>0.001</b>     |

|                   |                 |                 |                 |              |                 |                 |                 |              |                 |                 |                 |                  |
|-------------------|-----------------|-----------------|-----------------|--------------|-----------------|-----------------|-----------------|--------------|-----------------|-----------------|-----------------|------------------|
| Vitamin B1 (mg)   | 1.41<br>(0.51)  | 1.45<br>(0.34)  | 1.48<br>(0.51)  | 0.283        | 1.37<br>(0.51)  | 1.46<br>(0.34)  | 1.51<br>(0.34)  | <b>0.007</b> | 1.56<br>(0.51)  | 1.44<br>(0.39)  | 1.35<br>(0.51)  | <b>&lt;0.001</b> |
| Vitamin B2 (mg)   | 2.77<br>(1.02)  | 2.62<br>(0.85)  | 2.41<br>(1.02)  | <b>0.001</b> | 2.62<br>(1.02)  | 2.67<br>(0.85)  | 2.51<br>(1.02)  | 0.176        | 2.80<br>(1.12)  | 2.64<br>(1.03)  | 2.36<br>(1.12)  | <b>&lt;0.001</b> |
| Vitamin B3 (mg)   | 15.39<br>(7.65) | 15.51<br>(6.8)  | 14.94<br>(7.65) | 0.627        | 15.59<br>(7.65) | 15.11<br>(6.63) | 15.24<br>(7.48) | 0.736        | 16.27<br>(7.65) | 15.30<br>(7.14) | 14.28<br>(7.65) | <b>0.010</b>     |
| Vitamin B12 (mcg) | 9.78<br>(16.50) | 9.53<br>(14.46) | 5.95<br>(16.50) | <b>0.009</b> | 9.56<br>(16.84) | 8.67<br>(14.46) | 7.23<br>(16.50) | 0.255        | 9.78<br>(17.19) | 8.34<br>(15.65) | 7.31<br>(17.15) | 0.270            |

All values are mean (SD) and adjusted for total energy intake. PDI: whole plant-based diet index, hPDI: healthful plant-based diet index, uPDI: unhealthful plant-based diet index.

\* Calculated by multivariate analysis of variance.

**Table S4.** Distribution of anthropometric status in infants (n= 290)

| <b>Variable</b>                 | <b>Number</b> | <b>Percent</b> |
|---------------------------------|---------------|----------------|
| Underweight at 2 months of age  | 11            | 3.8            |
| Underweight at 4 months of age  | 4             | 1.4            |
| Overweight at 2 months of age   | 46            | 15.8           |
| Overweight at 4 months of age   | 43            | 14.7           |
| Stunting at 2 months of age     | 76            | 26.0           |
| Stunting at 4 months of age     | 76            | 26             |
| Microcephaly at 2 months of age | 11            | 3.8            |
| Microcephaly at 4 months of age | 15            | 5.1            |
| Macrocephaly at 2 months of age | 19            | 6.5            |
| Macrocephaly at 4 months of age | 36            | 12.3           |

World Health Organization growth curves were used for all growth outcomes and growth categories were defined as underweight ( $-2SD \geq Z$ -score for weight for age), overweight ( $Z$ -score  $\geq +2SD$  for weight for age) and stunted ( $-2SD \geq Z$ -score for height for age).  $Z$ -score of head circumference for age were used to determine microcephaly ( $<-2$  SD) and macrocephaly of the infants ( $Z > +2$  SD).
